# Supplementary material
Source: PubMed Central journal article supplement (PMC2877638)
Supplement: E09-09-0774_1.pdf [file E09-09-0774_1.pdf]

**A**

```

Q8N4F7|RN175_HUMAN      MAAGTAARKAAPVLEAPPQQEQLSHTKLSAEDTWNLQQERMYKMHRGHDS 50
Q9H920|RN121_HUMAN      MAAVVEVEVGGGAAGER-ELDEVMSDLSPEEQWRVEHARMHAKHRGHEA 49
sp|Q09251|RN121_CAEEEL  -----MGQHGAIRLQNEVQEGMPPPELHTEEEQWAEEHKRMHEKHKHGHEA 45
                          . . . : . * : * * : : * : * : * :

```

```

Q8N4F7|RN175_HUMAN      MHVEMILIFLCVLVIAQIVLVQWRQRHGRSYNLVTLTQMWWVPLYFTIKL 100
Q9H920|RN121_HUMAN      MHAEMVLIIATLVVAQLLLVQWKQRHPRSYNMVTLFQMWWVPLYFTVKL 99
sp|Q09251|RN121_CAEEEL  MHMEMMVI FMSIVVGGQIFLV TWKRKHFKSYQMCTLIGMLTIPVYVCFNR 95
                          ** * : : * : : : : : : : : : * : : : : * : * : * : : :

```

```

Q8N4F7|RN175_HUMAN      YWWRFSLMWGMFVSVITSYILFRATRKLPLSGRTPRLVYKWFLLIYKLSYAF 150
Q9H920|RN121_HUMAN      HWWRFVLVIWILFSAVTAFTVFRATRKLPLVQTTPRLVYKWFLLIYKISYAT 149
sp|Q09251|RN121_CAEEEL  SWYRFLATWLVFCIFSAF IWLKASQAHTISGGT PRFVYKWFVFLHKLSYVL 145
                          * : * * * * * * : * . : : : : : : : : : * : * : * : * : * : * :

```

```

Q8N4F7|RN175_HUMAN      GVVGYLAIMFTMCGENLFFKIKARDSMDFGIVSLFYGLYYGVMGRDFAEI 200
Q9H920|RN121_HUMAN      GIVGYMAVMFTLFLGNLLFKIKPEDAMDFGISLLFYGLYYGVLERDFAEM 199
sp|Q09251|RN121_CAEEEL  GVVGYLIMMGALLGFHVLFVGSQPTLMDAGILFMFYGVYYGVLGRDFAHI 195
                          * : * * * : * : : : * : : : * : . * * * * : * * : * * : * : * : :

```

```

Q8N4F7|RN175_HUMAN      CSDYMASTIGFYSVSRPLPTRSLSDNICAVCG-----OKIIVEL 238
Q9H920|RN121_HUMAN      CADYMASTIGFYSVSGMPTKHLSDSVCVAVCG-----QQIFVDV 237
sp|Q09251|RN121_CAEEEL  CTARMASRIGYTYPEGLPKKHLEDGVCVAVCGGRLLDDSEHVDADAVVTTK 245
                          * : * * * * * : * : . * : * : * : * : * : * : * : * : * : * :

```

```

Q8N4F7|RN175_HUMAN      DEEGLIENTYQLSCNHVFHEFCIRGWCIVGKKQTCPYCKEKVDLKRMI SN 288
Q9H920|RN121_HUMAN      SEEGI IENTYRLSCNHVFHEFCIRGWCIVGKKQTCPYCKEKVDLKRMF SN 287
sp|Q09251|RN121_CAEEEL  MVEDEDEKLYKLSGSHVFHEFCIRGWVVVVKLQTCPYCKERVDLQRMFKN 295
                          * . * : * : * * * . * * * * * * * * * * : * * * * * * * : * * : * : *

```

```

Q8N4F7|RN175_HUMAN      PWERTHFLYQILDWLRYLVAWQPVVIGIVQGINYSLGLE 328
Q9H920|RN121_HUMAN      PWERPHVMYQLLDWRYLVAWQPVIIGVVQGINYILGLE 327
sp|Q09251|RN121_CAEEEL  PWEKPHLFYGKLLDWIRYLVCWQPLIVTAVQGLTTWMLGLE 335
                          * * : . * : * * : * * : * * : * * : * * : * * : * * : * * : * *

```

Transmembrane domains

RING finger domain

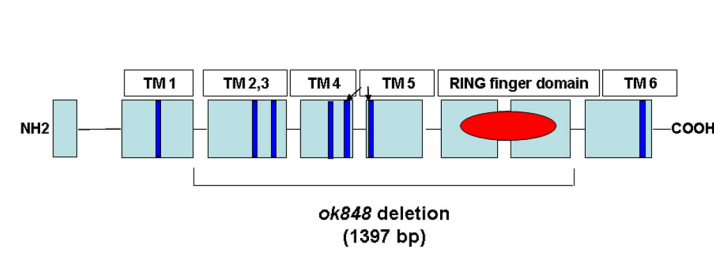

**Figure S1. Protein sequence and gene structure.**  
(A) Clustal W multiple alignment showing homology of the predicted transmembrane domains and the RING finger in the worm and human orthologs. Human RNF121 has 51% identity and 68% similarity and human RNF175 has 47% identity and 68% similarity to the *C. elegans* RNF-121. The cysteine and histidine residues of the RING-H2 domain are labeled. (B) The genomic structure of the *rnf-121* gene. Exons are shown in light blue boxes. The blue lines are the predicted transmembrane domains. The deleted region in the *rnf-121(ok848)* mutant strain is marked.

**hsp-4::gfp**

**wild-type**

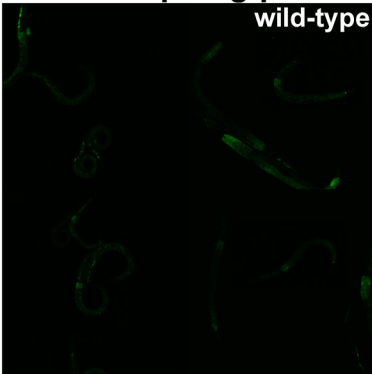

***rnf-121(ok848)***

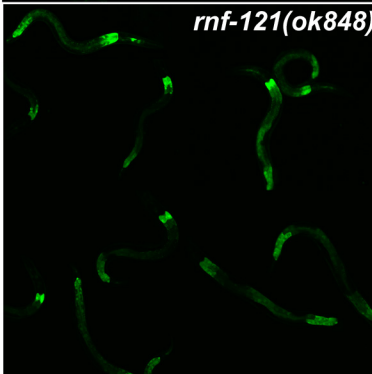

**Figure S2. Induction of hsp-4::gfp expression in *rnf-121(ok848)* worms.**

Elevated basal expression of the hsp-4::gfp transcriptional reporter in *rnf-121(ok848)* mutant.

Worms were grown under normal conditions at 20°C.

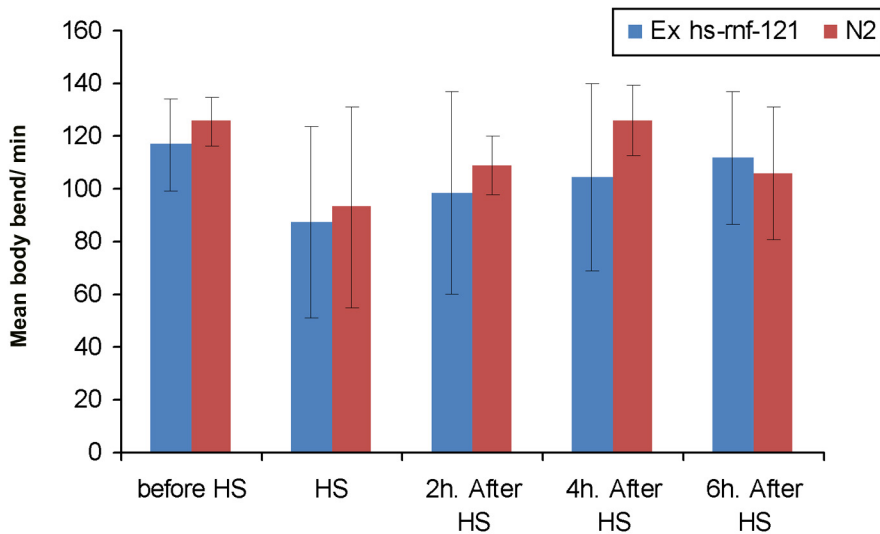

**Figure S3. Ectopic expression of RNF-121 has moderate effect on motility.**

Motility assays for wild-type (N2) worms and transgenic *hsp-16p::RNF-121* worms were performed before heat shock, immediately after heat shock (HS) and at the indicated time points following heat shock.  $n=40$  for each group.

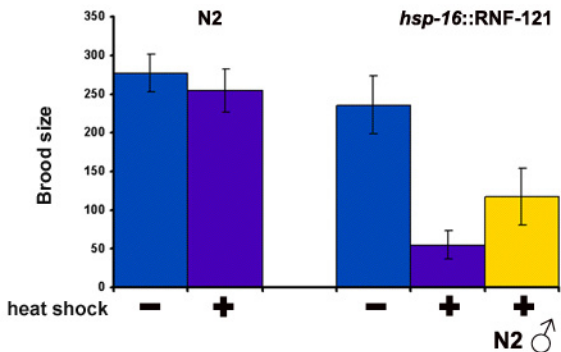

### Figure S4. Effect of RNF-121 ectopic expression on fertility.

Heat shock of N2 (wild type) and *hsp-16p::RNF-121* worms at the mid-L2 stage (+) and control (-). The total number of progeny of each worm was counted.  $n > 60$  worms were analyzed for each strain and condition in 3 independent experiments. Mean and standard error values are shown.

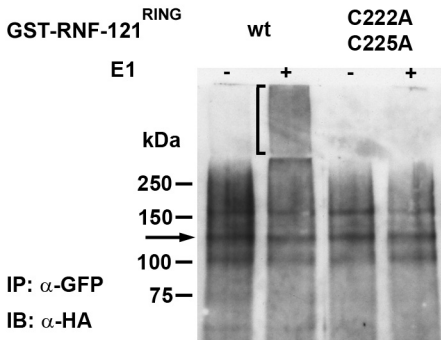

**Figure S5. In vitro ubiquitination of immunopurified PAT-3::GFP**  
 Equal aliquots of immunopurified PAT-3::HA::GFP from PAT-3::HA::GFP worms (wild-type background) were used in each reaction in the presence of bacterially expressed and purified GST-RNF-121RING or GST-RNF-121C222AC225A and E2, HA-ubiquitin and ATP, with or without E1 as indicated. Reactions were incubated at 37°C for 20 min and terminated with 8M urea buffer. Black arrow indicate PAT-3::HA::GFP. The ubiquitinated forms of PAT-3::HA::GFP are indicated by parentheses.

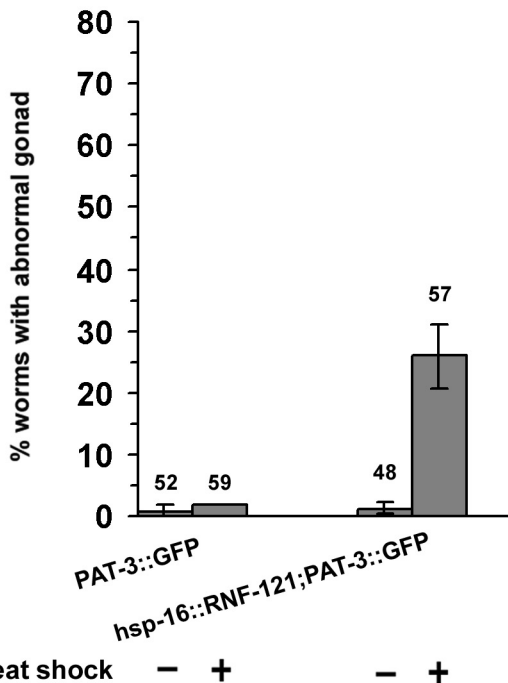

**Figure S6. High levels of PAT-3 suppress the gonad defects induced by RNF-121.**

Percentage of animals with abnormal gonads. Analysis was performed to PAT-3::GFP and PAT-3::GFP; hsp-16p::RNF-121 transgenic lines. Worms were treated with heat shock at mid-L2 stage to induce transgene expression (+) or non-treated controls (-). n=total number of worms analyzed in 3 independent experiments (indicated above each bar). Compare values to Figure 4l.

**Table S1.** Mean and STD values of developmental stage distributions of N2 and *rnf-121(ok848)* worms following treatment with tunicamycin

| Tunicamycin<br>( $\mu\text{g/ml}$ ) | Developmental stage<br>(72hr at 20°C) | N2               |      | <i>rnf-121(ok848)</i> |      |
|-------------------------------------|---------------------------------------|------------------|------|-----------------------|------|
|                                     |                                       | % <sup>(*)</sup> | n    | % <sup>(*)</sup>      | n    |
| 0                                   | L4 and adult                          | 100              | 1331 | 99.5 $\pm$ 1.2        | 1273 |
|                                     | L3 and younger                        | 0                |      | 0.2 $\pm$ 0.1         |      |
|                                     | Larval lethality                      | 0                |      | 0.3 $\pm$ 0.1         |      |
| 2                                   | L4 and adult                          | 68.9 $\pm$ 22.5  | 1404 | 23.7 $\pm$ 12.1       | 1186 |
|                                     | L3 and younger                        | 22.4 $\pm$ 16.5  |      | 67.6 $\pm$ 15.2       |      |
|                                     | Larval lethality                      | 8.7 $\pm$ 7.4    |      | 8.7 $\pm$ 5.8         |      |
| 5                                   | L4 and adult                          | 0                | 732  | 0                     | 1171 |
|                                     | L3 and younger                        | 62.3 $\pm$ 4.1   |      | 51.8 $\pm$ 8.5        |      |
|                                     | Larval lethality                      | 37.7 $\pm$ 3.9   |      | 48.2 $\pm$ 8.7        |      |
| 7.5                                 | L4 and adult                          | 0                | 562  | 0                     | 1056 |
|                                     | L3 and younger                        | 41.2 $\pm$ 9.7   |      | 35.9 $\pm$ 11.0       |      |
|                                     | Larval lethality                      | 58.8 $\pm$ 9.8   |      | 64.1 $\pm$ 12.1       |      |

<sup>(\*)</sup> Mean values of 3-6 independent experiments; n= total number of worms. For experimental conditions see Material and Methods.

**Table S2.** Mean and STD values of developmental stage distributions of N2 worms fed with control vector (L4440) or *rnf-121(RNAi)* following treatment with tunicamycin

| Tunicamycin<br>( $\mu\text{g/ml}$ ) | Developmental stage<br>(72hr at 20°C) | L4440            |      | <i>rnf-121(RNAi)</i> |      |
|-------------------------------------|---------------------------------------|------------------|------|----------------------|------|
|                                     |                                       | % <sup>(*)</sup> | n    | % <sup>(*)</sup>     | n    |
| 0                                   | L4 and adult                          | 100              | 1330 | 99.9 $\pm$ 0.3       | 1765 |
|                                     | L3 and younger                        | 0                |      | 0.1 $\pm$ 0.3        |      |
|                                     | Larval lethality                      | 0                |      | 0                    |      |
| 1                                   | L4 and adult                          | 99.1 $\pm$ 1.3   | 1525 | 93.8 $\pm$ 8.3       | 1601 |
|                                     | L3 and younger                        | 0.5 $\pm$ 1.1    |      | 3.4 $\pm$ 4.8        |      |
|                                     | Larval lethality                      | 0.4 $\pm$ 0.7    |      | 2.8 $\pm$ 3.5        |      |
| 2                                   | L4 and adult                          | 80.5 $\pm$ 12.1  | 1398 | 67.9 $\pm$ 8.7       | 1351 |
|                                     | L3 and younger                        | 14.2 $\pm$ 10.0  |      | 24.5 $\pm$ 6.8       |      |
|                                     | Larval lethality                      | 5.3 $\pm$ 4.1    |      | 7.6 $\pm$ 2.1        |      |

|   |                  |          |      |           |      |
|---|------------------|----------|------|-----------|------|
| 3 | L4 and adult     | 55.2±8.3 | 1306 | 34.6±17.1 | 1372 |
|   | L3 and younger   | 26.1±6.5 |      | 46.8±12.4 |      |
|   | Larval lethality | 18.7±4.2 |      | 18.6±5.2  |      |
| 5 | L4 and adult     | 10.1±3.6 | 1089 | 7.8±5.3   | 1040 |
|   | L3 and younger   | 42.4±5.2 |      | 44.1±7.4  |      |
|   | Larval lethality | 47.5±5.6 |      | 48.1±9.1  |      |

(\*) Mean values of 3-6 independent experiments; n= total number of worms. For experimental conditions see Material and Methods.

**Table S3.** Mean and STD values of developmental stage distributions of *ire-1(v33)* worms fed with control vector (L4440) or *rnf-121(RNAi)* following treatment with tunicamycin

| Tunicamycin<br>(µg/ml) | Developmental stage<br>(72hr at 20°C) | L4440      |      | <i>rnf-121(RNAi)</i> |      |
|------------------------|---------------------------------------|------------|------|----------------------|------|
|                        |                                       | %(*)       | n    | %(*)                 | n    |
| 0                      | L4 and adult                          | 94.3±7.8   | 1360 | 85.5±19.5            | 1126 |
|                        | L3 and younger                        | 5.7±7.9    |      | 13.6±19.6            |      |
|                        | Larval lethality                      | 0.05±0.2   |      | 0.9±3.3              |      |
| 1                      | L4 and adult                          | 92.2±6.8   | 1076 | 86.2±14.1            | 864  |
|                        | L3 and younger                        | 7.2±7.0    |      | 13.4±13.1            |      |
|                        | Larval lethality                      | 0.6±1.1    |      | 0.4±0.3              |      |
| 2                      | L4 and adult                          | 73.3±11.3  | 930  | 40.1±19.7            | 882  |
|                        | L3 and younger                        | 24.6±11.44 |      | 48.1±12.6            |      |
|                        | Larval lethality                      | 2.1±2.4    |      | 11.8±13.0            |      |
| 3                      | L4 and adult                          | 39.6±12.5  | 568  | 9.1±9.8              | 454  |
|                        | L3 and younger                        | 55.3±14.7  |      | 84.6±11.2            |      |
|                        | Larval lethality                      | 5.1±3.3    |      | 6.3±4.6              |      |
| 5                      | L4 and adult                          | 1.7±3.1    | 935  | 1.2±1.7              | 972  |
|                        | L3 and younger                        | 53.6±7.5   |      | 47.2±7.8             |      |
|                        | Larval lethality                      | 44.7±6.8   |      | 51.6±7.6             |      |

(\*) Mean values of 3-6 independent experiments; n= total number of worms. For experimental conditions see Material and Methods.



**Table S4.** Mean and STD values of developmental stage distributions of *atf-6(ok551)* worms fed with control vector (L4440) or *rnf-121(RNAi)* following treatment with tunicamycin

| Tunicamycin<br>( $\mu\text{g/ml}$ ) | Developmental stage<br>(72hr at 20°C) | L4440            |      | <i>rnf-121(RNAi)</i> |      |
|-------------------------------------|---------------------------------------|------------------|------|----------------------|------|
|                                     |                                       | % <sup>(*)</sup> | n    | % <sup>(*)</sup>     | n    |
| 0                                   | L4 and adult                          | 100              | 1537 | 100                  | 1806 |
|                                     | L3 and younger                        | 0                |      | 0                    |      |
|                                     | Larval lethality                      | 0                |      | 0                    |      |
| 1                                   | L4 and adult                          | 98.6 $\pm$ 4.4   | 1563 | 98.8 $\pm$ 1.3       | 1625 |
|                                     | L3 and younger                        | 1.4 $\pm$ 4.4    |      | 1.2 $\pm$ 1.3        |      |
|                                     | Larval lethality                      | 0                |      | 0                    |      |
| 2                                   | L4 and adult                          | 95.9 $\pm$ 5.5   | 1531 | 73.1 $\pm$ 8.8       | 1561 |
|                                     | L3 and younger                        | 3.8 $\pm$ 5.0    |      | 16.3 $\pm$ 3.9       |      |
|                                     | Larval lethality                      | 0.3 $\pm$ 0.8    |      | 10.6 $\pm$ 5.2       |      |
| 3                                   | L4 and adult                          | 87.4 $\pm$ 3.4   | 2002 | 54.8 $\pm$ 9.4       | 1464 |
|                                     | L3 and younger                        | 8.5 $\pm$ 2.4    |      | 29.8 $\pm$ 6.3       |      |
|                                     | Larval lethality                      | 4.1 $\pm$ 3.8    |      | 15.4 $\pm$ 5.3       |      |
| 5                                   | L4 and adult                          | 13.6 $\pm$ 4.6   | 1255 | 12.3 $\pm$ 5.4       | 1140 |
|                                     | L3 and younger                        | 40.1 $\pm$ 8.5   |      | 35.1 $\pm$ 9.8       |      |
|                                     | Larval lethality                      | 46.3 $\pm$ 8.8   |      | 52.6 $\pm$ 10.6      |      |

<sup>(\*)</sup> Mean values of 3-6 independent experiments; n= total number of worms. For experimental conditions see Material and Methods.

**Table S5.** Mean and STD values of developmental stage distributions of *pek-1(ok275)* worms fed with control vector (L4440) or *rnf-121(RNAi)* following treatment with tunicamycin

| Tunicamycin<br>( $\mu\text{g/ml}$ ) | Developmental stage<br>(72hr at 20°C) | L4440            |      | <i>rnf-121(RNAi)</i> |      |
|-------------------------------------|---------------------------------------|------------------|------|----------------------|------|
|                                     |                                       | % <sup>(*)</sup> | n    | % <sup>(*)</sup>     | n    |
| 0                                   | L4 and adult                          | 99.7±0.9         | 1789 | 99.6±0.8             | 1650 |
|                                     | L3 and younger                        | 0.3±0.9          |      | 0.4±0.8              |      |
|                                     | Larval lethality                      | 0                |      | 0                    |      |
| 1                                   | L4 and adult                          | 94.9±5.4         | 1413 | 89.6±5.7             | 1512 |
|                                     | L3 and younger                        | 3.9±4.5          |      | 6.2±3.3              |      |
|                                     | Larval lethality                      | 1.2±1.6          |      | 4.1±3.1              |      |
| 2                                   | L4 and adult                          | 29.5±10.7        | 1097 | 33.4±8.2             | 1175 |
|                                     | L3 and younger                        | 50.9±11.0        |      | 44.6±4.1             |      |
|                                     | Larval lethality                      | 19.6±3.4         |      | 22.0±6.9             |      |
| 3                                   | L4 and adult                          | 4.6±2.3          | 998  | 8.9±2.8              | 1257 |
|                                     | L3 and younger                        | 75.2±6.3         |      | 60.4±2.6             |      |
|                                     | Larval lethality                      | 20.2±5.7         |      | 30.7±2.5             |      |
| 5                                   | L4 and adult                          | 3.2±4.9          | 1127 | 3.0±3.3              | 1146 |
|                                     | L3 and younger                        | 49.4±7.7         |      | 47.4±8.8             |      |
|                                     | Larval lethality                      | 47.4±7.7         |      | 49.6±8.2             |      |

<sup>(\*)</sup> Mean values of 3-6 independent experiments; n= total number of worms. For experimental conditions see Material and Methods.
